# Supplementary material
Source: publisher figshare collection journal article supplement (https://acs.figshare.com/ndownloader/files/13878998)
Supplement: Supplementary file 1 [file 13878998]

# Supporting information

## Smart Bacterial Magnetic Nanoparticles for Tumor-Targeting Magnetic Resonance Imaging of HER2-Positive Breast Cancers

Yunlei Zhang,<sup>\*,†</sup> Qianqian Ni,<sup>†</sup> Chaoli Xu,<sup>†</sup> Yuanyuan Geng,<sup>⊥</sup> Gang Zheng,<sup>†</sup> Zhenlu Yang,<sup>†</sup> Jun Tao,<sup>§</sup> Ying Zhao,<sup>†</sup> Jun Wen,<sup>†</sup> Junjie Zhang,<sup>§</sup> Shouju Wang,<sup>†</sup> Yuxia Tang,<sup>†</sup> Yanjun Li,<sup>†</sup> Qirui Zhang,<sup>†</sup> Li Liu,<sup>†</sup> Zhaogang Teng,<sup>\*,†</sup> Guangming Lu<sup>\*,†,‡</sup>

<sup>†</sup>Department of Medical Imaging, Jinling Hospital, School of Medicine, Nanjing University, Nanjing, 210002 Jiangsu, P. R. China

<sup>‡</sup> State Key Laboratory of Analytical Chemistry for Life Science, School of Chemistry and Chemical Engineering, Nanjing University, Nanjing 210093, P.R. China

<sup>⊥</sup>State Key Laboratory of Agrobiotechnology, College of Biological Sciences, China Agricultural University, Yuanmingyuan West Road 2, Beijing 100193, China

<sup>§</sup>Key Laboratory for Organic Electronics and Information Displays & Institute of Advanced Materials (IAM), Jiangsu National Synergetic Innovation Centre for Advanced Materials (SICAM), Nanjing University of Posts & Telecommunications, 9 Wenyuan Road, Nanjing 210023, P.R. China

<sup>⊥</sup>Department of Ultrasound Diagnostics, Jinling Hospital, Nanjing University School of Medicine, Nanjing, 210002 Jiangsu, P.R. China

\*Corresponding Author. Fax: +86 25 8480 4659. Tel: +86 25 8086 0185. E-mail: Yunlei\_zhang@126.com; tgz@fudan.edu.cn; cjr.luguangming@vip.163.com

## **Protein sequence**

The amino acids of MamC protein from *Magnetospirillum gryphiswaldense* MSR-1:

MSFQLAPYLAKSVPGIGILGGIVGGAAALAKNARLLKDKQITGTEAAIDTGKEAA

GAGLATAFSAVAATAVGGGLVVSLGAALIAGVAAKYAWDLGVDFIEKELRHGK

SAEATASDEDILREELA; The amino acids of HER2 affibody with Histag and two

cysteines: ATVDNKFNKELRQAYWEIQALPNLNWTQSRAFIRSLYDDPSQ

SANLLAEAKKLNDAPKGS SHHHHHHCC. The protein sequences of MamC-HAF

and MamC-THAF were listed as the following:

MamC-HAF:

MSFQLAPYLAKSVPGIGILGGIVGGAAALAKNARLLKDKQITGTEAAIDTGKEAA

GAGLATAFSAVAATAVGGGLVVSLGAALIAGVAAKYAWDLGVDFIEKELRHGK

SAEATASDEDILREELAGGGGSGGGGSGGGGSATVDNKFNKELRQAYWEIQALP

NLNWTQSRAFIRSLYDDPSQSANLLAEAKKLNDAPKGS SHHHHHHHCC.

MamC-THAF:

MSFQLAPYLAKSVPGIGILGGIVGGAAALAKNARLLKDKQITGTEAAIDTGKEAA

GAGLATAFSAVAATAVGGGLVVSLGAALIAGVAAKYAWDLGVDFIEKELRHGK

SAEATASDEDILREELAGGGGSGGGGSGGGGSATVDNKFNKELRQAYWEIQALP

NLNWTQSRGSSHHHHHHCC.

## Gene sequence

The optimized gene sequence of MamC (black color) , glycine-glycine-cysteines(low-case letter), HER2 affibody (red color) with 6 × Histags (blue color) and three cysteines (purple color) for protein expression in *E.coli* BL21:

ATGAGCTTTCAGCTGGCACCGTATCTGGCCAAAAGTGTGCCGGGTATTGGCA  
TTCTGGGTGGTATTGTTGGCGGTGCAGCCGCACTGGCAAAAAATGCCCGCCT  
GCTGAAGGACAAACAGATTACCGGCACCGAAGCCGCCATTGATACCGGTAA  
AGAAGCAGCCGGTGCAGGTCTGGCAACCGCCTTTAGCGCAGTTGCAGCCACC  
GCAGTGGGTGGTGGTCTGGTGGTGAGTCTGGGTGCAGCCCTGATTGCAGGTG  
TGGCCGCCAAATATGCCTGGGATCTGGGCGTGGACTTCATCGAAAAGGAACT  
GCGCCACGGTAAAAGCGCCGAAGCCACCGCCAGCGATGAGGATATTCTGCGC  
GAAGAACTGGCCggcggcgggcggcagcggcgggcggcgggcagcggcgggcgggcggcagcGTGGATAA  
TAAATTTAACAAAGAACTGCGCCAGGCCTATTGGGAAATTCAGGCCCTGCCG  
AATCTGAATTGGACCCAGAGCCGCGCCTTTATCCGCAGCCTGTATGATGATCC  
GAGCCAGAGCGCCAACCTGCTGGCCGAAGCCAAAAAACTGAACGATGCCCA  
GGCCCCGAAAGGCAGCAGCCATCACCATCATCATCATAGCAGCGGCTGCTGC  
TGCggcagcagcCATCACCATCATCATCATTTGCTGCTGA

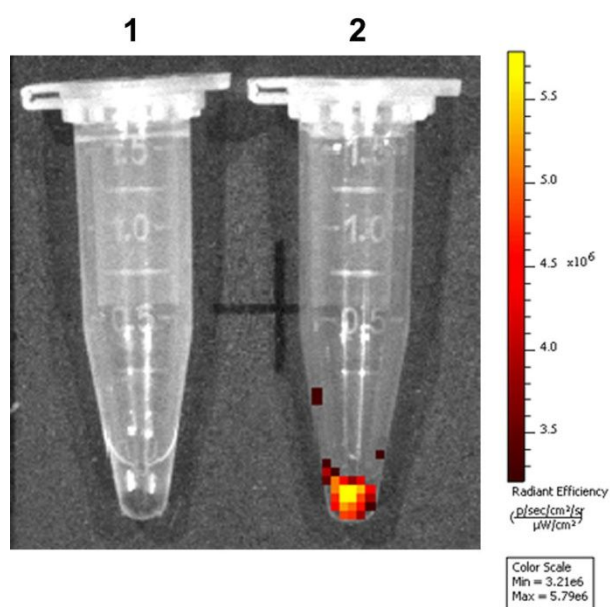

**Figure S1.** Cy5.5 conjugated BMW-HAF. Maleimide derivative cyanine dyes were incubated with BMW-HAF without (1) or with (2) the thiol groups for 3 h. The pellets were washed using PBS for 3 to 5 times and imaged through using the IVIS Spectrum System.

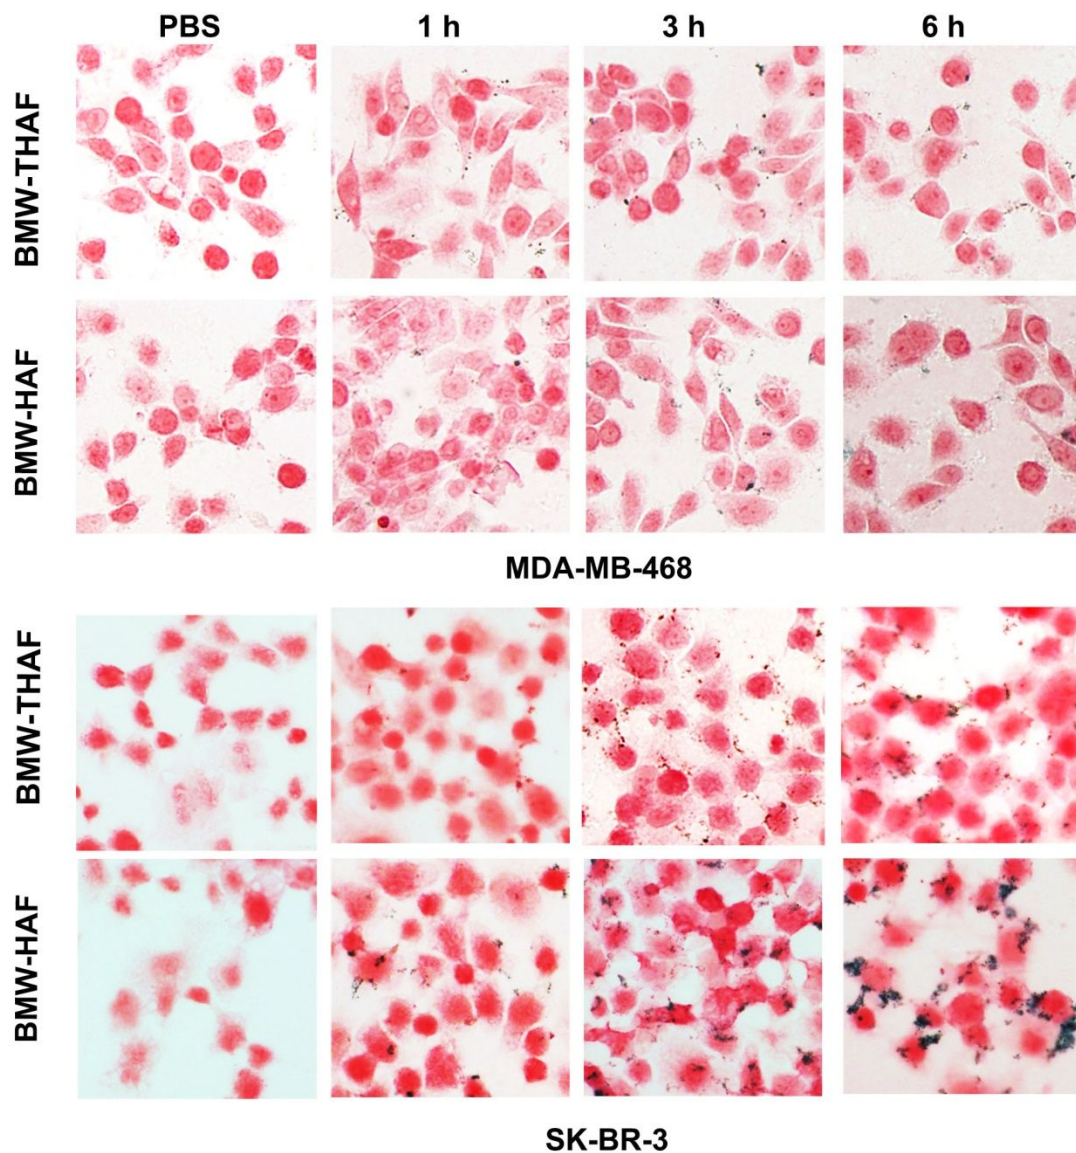

**Figure S2.** Prussian blue staining of iron in the breast cancer cells. MDA-MB-468 and SK-BR-3 cells incubated with BMW-HAF and BMW-THAF for 1 h, 3h and 6 h under cell culture condition. At a defined time, the cells were stained by using Prussian blue staining and captured under microcopy.

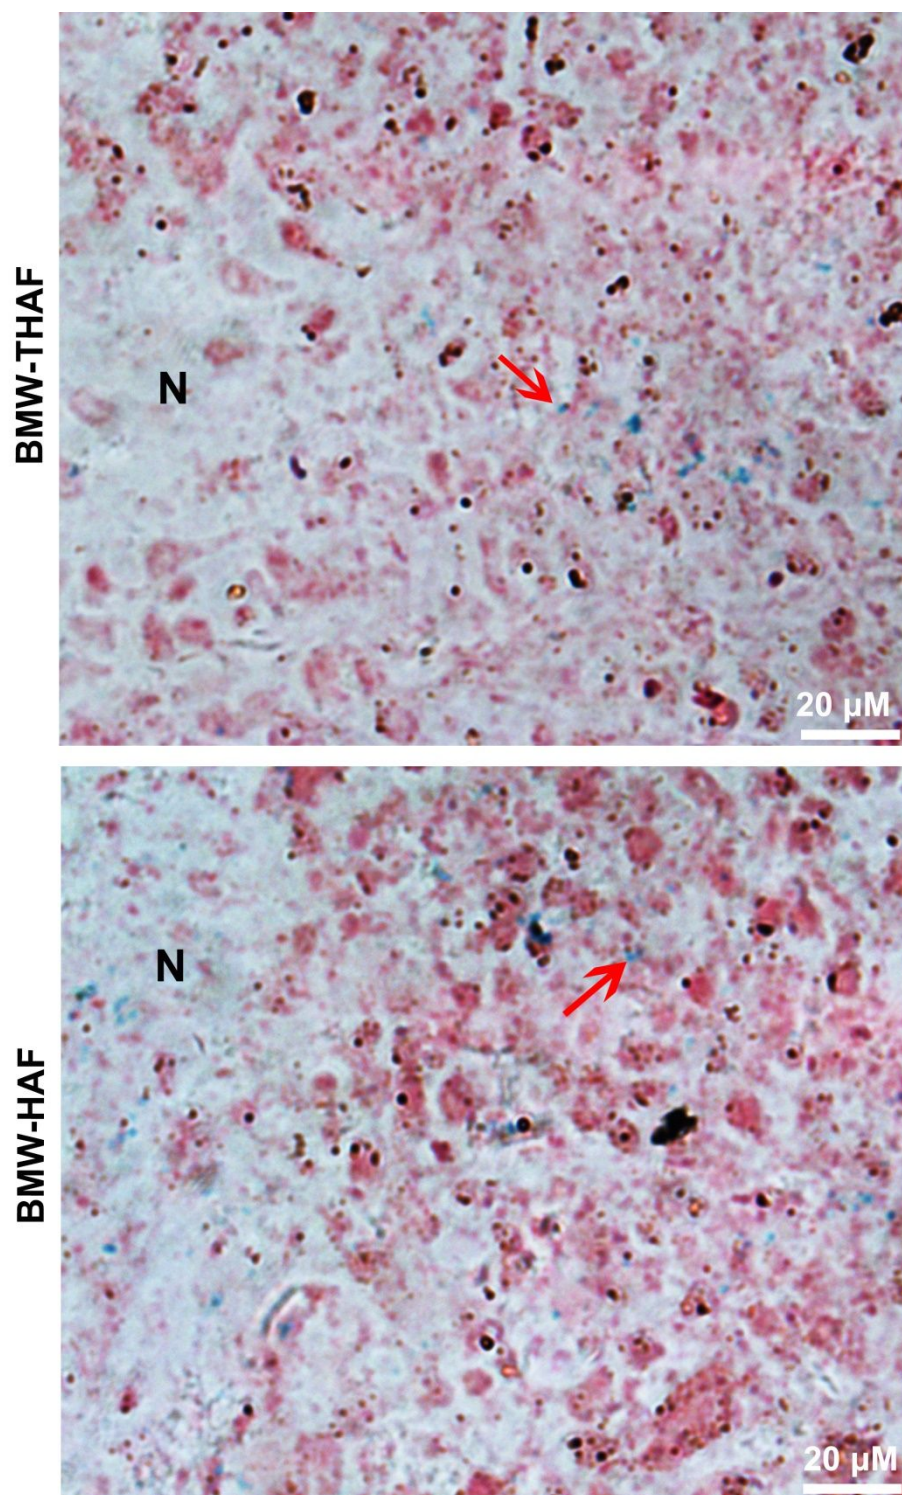

**Figure S3.** Localization of iron in the tumor sections. The mice bearing SK-BR-3 tumors were i.v. administrated with BMW-HAF or BMW-THAF. The tumors were excised after

24 h and stained through using Prussian blue staining. Blue point indicates the iron; N stands for necrosis.

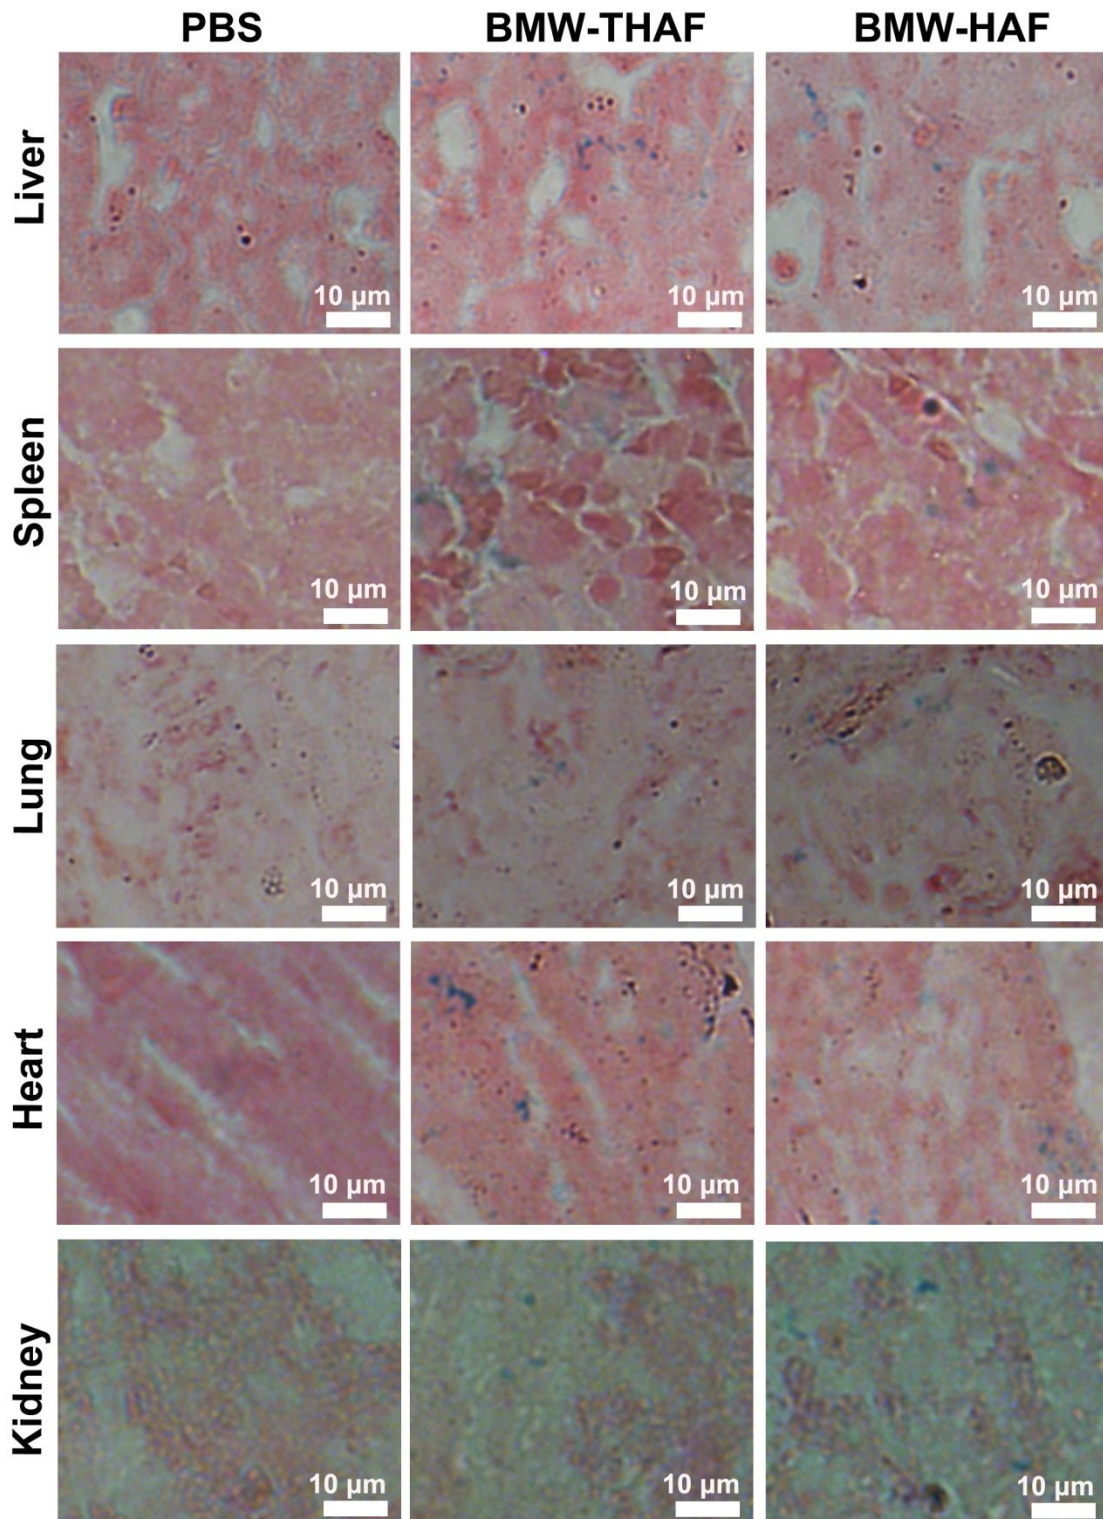

**Figure S4.** Prussian blue staining of iron in different organs. The mice bearing SK-BR-3 tumors were i.v. injected of BMW-HAF. The livers, spleens, lungs, hearts and kidneys were stained by using Prussian blue staining. Blue point indicates the iron.

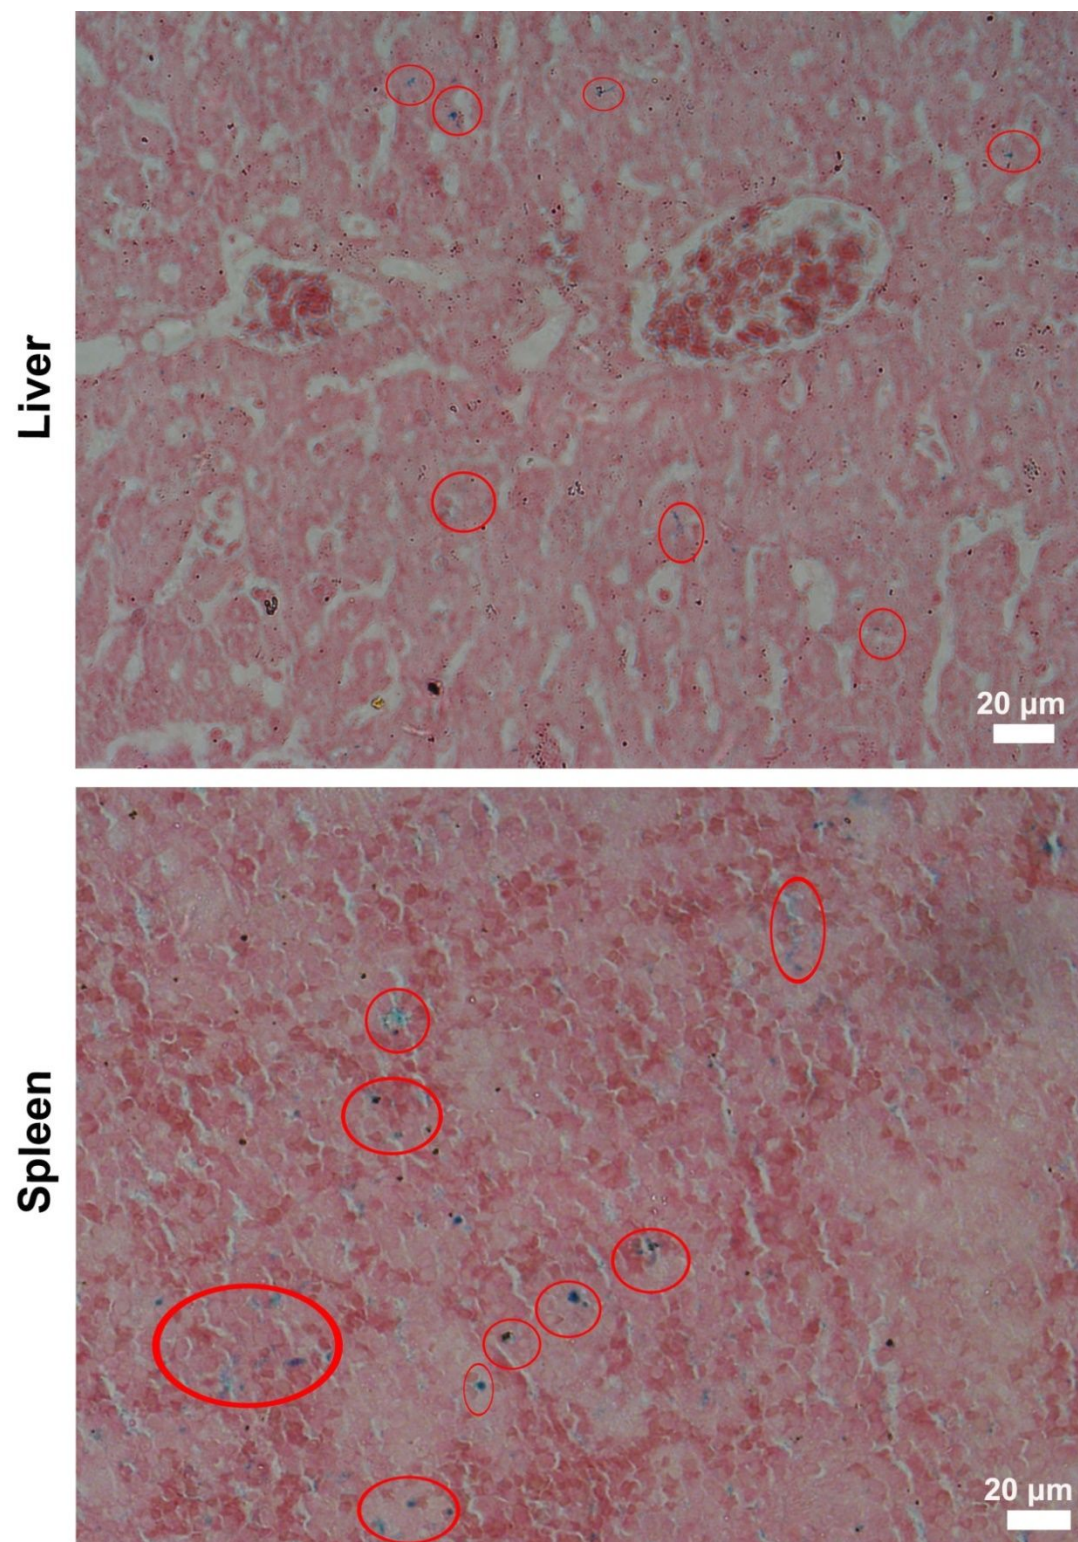

**Figure S5.** Localization of irons in the liver and spleen. The mice bearing SK-BR-3 tumors were i.v. injected of BMW-HAF. The sections of livers and spleens were stained

by using Prussian blue staining. The blue point in the red circle stands for irons.
